# Supplementary material
Source: Springer Nature journal article supplement (https://www.springermedizin.de/resource/supplementary/13049_2009_38_MOESM1_ESM.pdf/9665754)

**Figure 1**

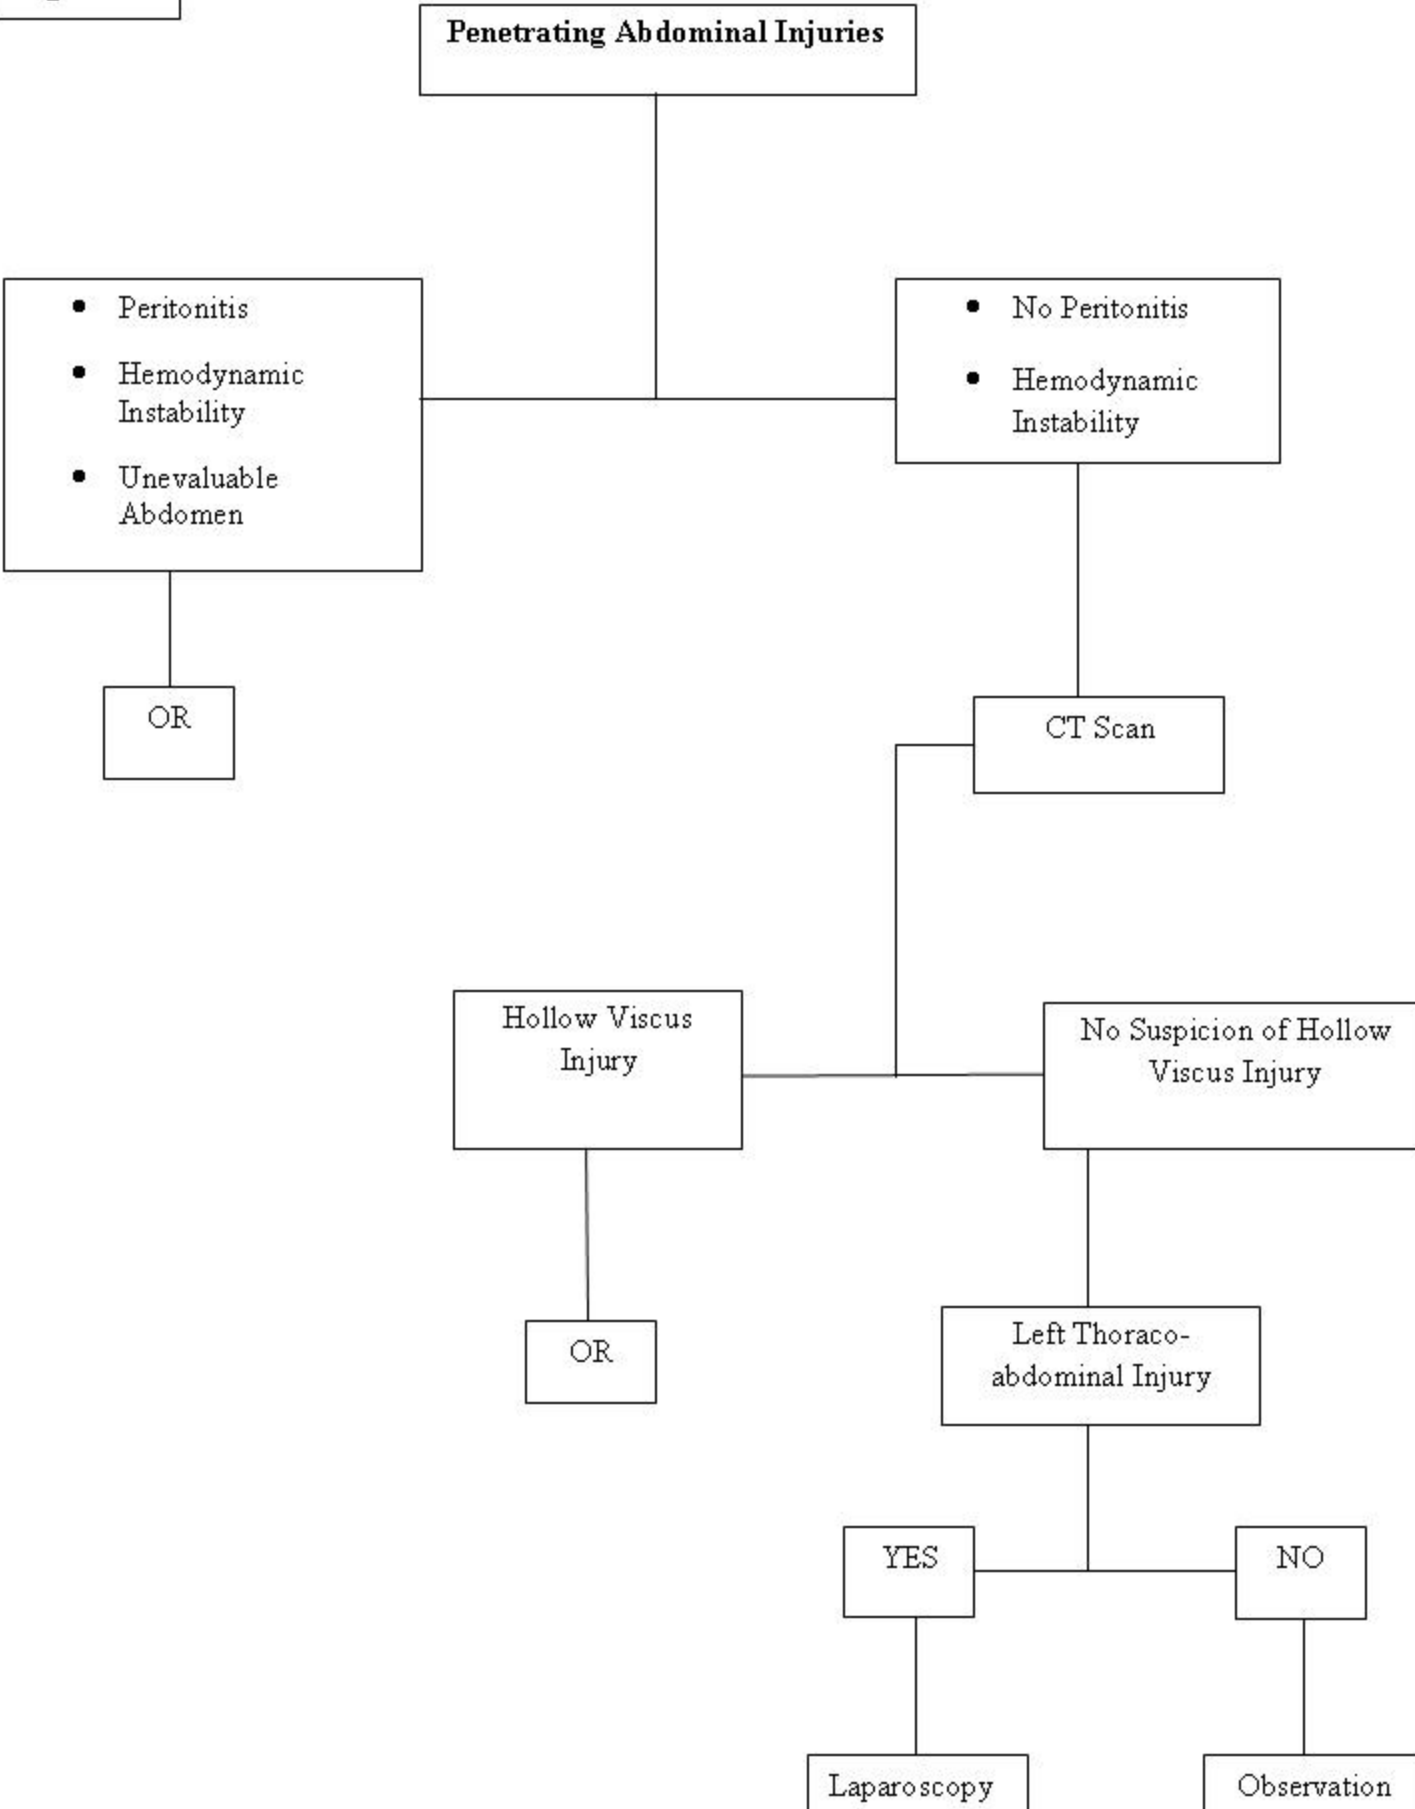

Supplement: MOESM1 [file 9665754]
